# Supplementary material for: Influence of physical activity on the progression of osteoarthritis of the nonoperative hip after unilateral total hip arthroplasty: A prospective cohort study
Source: Research Square preprint supplement (doi:10.21203/rs.3.rs-1631037/v1), 2022-05-13
Supplement: Supplementary file 2 [file e46b2c7d0a4e48c13ceae568.xlsx]

## Sheet: table1
			Overall		KL 0 (n=49)		KL ≥1 (n=36)		p value
										Adjusted
Age			63.3	(7.6)	64.7	(8.0)	61.4	(6.5)	0.036*
Height			154.5	(149.7 to 157.7)	153	(148.5 to 156.9)	154.5	(153.0 to 158.0)	0.081
Body weight			55.6	(49.4 to 59.5)	54.6	(49.5 to 59.3)	55.95	(48.5 to 59.8)	0.982
BMI			23.0	(21.1 to 25.3)	22.5	(21.6 to 26.0)	23.1	(20.0 to 25.1)	0.274
Pain (VAS, mm)
	Pre		2.0	(0.0 to 4)	2.0	(0.5 to 3)	2.0	(0.0 to 17.3)	0.435	0.444
	6M		2.0	(0.0 to 6.0)	1.0	(0.0 to 4.0)	2.0	(0.0 to 17.0)	0.289	0.317
CE angle (degree)			31	(25.5 to 35.5)	32	(27.5 to 36.5)	28	(24.0 to 33.8)	0.028*	0.032*
Sharp angle (degree)			36.0	(35.0 to 43.0)	36.0	(35.0 to 42.0)	41.0	(35.3 to 44.0)	0.204	0.377
AHI (%)			83.9	(7.0)	86.3	(5.4)	80.7	(7.7)	<0.001*	<0.001*
LLD (mm)			2.2	(7.1)	2	(7.7)	2.4	'(6.2)	0.805	0.704
MJS (mm)
	Pre		3.53	(1.00)	3.99	(0.78)	2.91	(0.89)	<0.001*	<0.001*
	6M		3.49	(0.99)	3.95	(0.77)	2.86	(0.93)	<0.001*	<0.001*
	2Y		3.31	(1.17)	3.87	(0.80)	2.55	(1.17)	<0.001*	<0.001*
	ΔMJS		0.18	(0.38)	0.08	(0.19)	0.31	(0.52)	0.016*	0.018*
Hip abductor muscle strength (Nm/kg)
	Pre	Ope	0.74	(0.23)	0.73	(0.23)	0.76	(0.22)	0.496	0.602
		Not ope	0.92	(0.26)	0.91	(0.24)	0.94	(0.28)	0.626	0.717
	6M	Ope	0.94	(0.24)	0.92	(0.21)	0.96	(0.27)	0.452	0.612
		Not ope	1.00	(0.27)	0.98	(0.25)	1.03	(0.29)	0.478	0.575
ROM hip flexion
	Pre	Ope	85.0	(75.0 to 97.5)	85.0	(70.0 to 95.0)	87.5	(80.0 to 103.8)	0.187	0.134
		Not ope	105.0	(100.0 to 110.0)	105.0	(100.0 to 112.5)	110.0	(100.0 to 110.0)	0.856	0.850
	6M	Ope	100.0	(90.0 to 105.0)	100.0	(90.0 to 102.5)	100.0	(90.0 to 105.0)	0.426	0.381
		Not ope	110.0	(100.0 to 110.0)	110.0	(100.0 to 112.5)	110.0	(101.3 to 110.0)	1.000	0.569
JOA
	Pre	Ope	53.4	(12.2)	51.2	(12.2)	56.5	(11.6)	0.042*	0.046*
		Not ope	80.9	(7.0)	81.1	(7.4)	80.7	(6.6)	0.800	0.773
	6M	Ope	91.0	(87.0 to 94.5)	90.0	(86.5 to 94.0)	91.5	(89.3 to 95.8)	0.073	0.139
		Not ope	94.0	(91.0 to 97.0)	94.0	(90.0 to 97.0)	94.0	(91.3 to 97.0)	0.639	0.741
Gait speed (m/sec)
	Pre		1.50	(1.34 to 1.68)	1.45	(1.29 to 1.59)	1.55	(1.36 to 1.75)	0.035*	0.121
	6M		1.73	(1.59 to 1.83)	1.72	(1.58 to 1.80)	1.77	(1.62 to 1.87)	0.137	0.446
PA
	Daily step count (steps / day)		4747	(3545 to 6592)	4465	(3468 to 5842)	5010	(3790 to 7164)	0.255	0.372
	MVPA (min / day)		11.1	(5.8 to 20.0)	10.6	(4.8 to 22.2)	11.6	(7.4 to 18.3)	0.485	0.784
	30095

## Sheet: table2
		Gamma				Normal
		Regression	95% CI	p value	AIC	Regression	95% CI	p value	AIC
Daily step count	Step 1	-8.65×10-5	-1.22×10-4 to -4.74×10-5	< 0.001*	33.808	6.36×10-5	3.07×10-5 to 9.64×10-5	< 0.001*	69.123
	Step 2	-7.00×10-5	-1.03×10-4 to -3.47×10-5	< 0.001*	26.976	5.54×10-5	2.20×10-5 to 8.88×10-5	0.001*	65.5869
	Step 3 (Daily step count : KL)	7.88×10-5	1.31×10-5 to 1.46×10-4	0.023*	24.3#	-1.18×10-4	1.79×10-5 to 5.65×10-5	< 0.001*	52.9697
MVPA	Step 1	-7.44×10-3	-1.22×10-4 to -4.74×10-5	0.047*	45.575	5.47×10-3	-2.79×10-4 to 1.12×10-2	0.066	79.237
	Step 2	-5.77×10-3	-1.17×10-2 to 8.58×10-4	0.076	35.974	4.59×10-3	-1.23×10-3 to 1.05×10-2	0.103	73.9377
	Step 3 (MVPA : KL)	8.32×10-3	-3.81×10-3 to 2.09×10-2	0.189	36.303	-1.27×10-2	-2.40×10-2 to 1.40×10-3	0.028*	70.6459
Step 1	Univariate
Step 2	Multivariate (adjusted by age, body weight, 6M MJS, KL)
Step 3	Multivariate (adjusted by age, body weight, 6M MJS) with an interaction term between PA and KL

## Sheet: table3
Simple slope	Regression	95% CI	p value
KL 0	-2.01×10-5	-6.72×10-5 to 2.97×10-5	0.421
KL ≥1	-1.12×10-4	-1.52×10-4 to -6.35×10-5	< 0.001

## Sheet: table4
	Gamma				Normal
	Regression	95% CI	p value	AIC	Regression	95% CI	p value	AIC
Daily step count	1.69×10-4	-2.33×10-4 to -1.03×10-4	< 0.001*	20.694	1.50×10-4	8.96×10-5 to 2.10×10-4	< 0.001*	53.1829
KL	-4.26×10-1	-8.73×10-1 to 1.64×10-2	0.063		4.98×10-1	1.42×10-1 to 8.53×10-1	0.007
Daily step count : KL	9.17×10-5	2.51×10-5 to 1.60×10-4	0.009*		-1.13×10-4	-1.74×10-4 to 5.08×10-5	< 0.001*
MVPA	1.22×10-2	3.02×10-3 to 2.11×10-2	0.010*		-5.50×10-3	-1.41×10-2 to 3.06×10-3	0.205
Adjusted by age, body weight, 6M MJS
